# Supplementary material
Source: bioRxiv or medRxiv preprint supplement (https://medrxiv.org/highwire/filestream/85647/field_highwire_adjunct_files/0/2020.06.11.20128686-1.pdf)
Supplement: Supplementary file [file 2020.06.11.20128686-1.pdf]

Table S1: Patient characteristics, Heinsberg District, Germany, April 2020 (n=42)

|                                                | <b>Complete cohort</b> |         | <b>Asymptomatic</b> |         | <b>Symptomatic</b> |         |
|------------------------------------------------|------------------------|---------|---------------------|---------|--------------------|---------|
| Number of individuals n, (%)                   | 42                     | (100%)  | 16                  | (38.1%) | 26                 | (61.9%) |
| Age, median (range)                            | 44                     | (18-70) | 50                  | (23-70) | 42                 | (18-59) |
| Gender, n (%)                                  |                        |         |                     |         |                    |         |
| Female                                         | 26                     | (61.9%) | 16                  | (61.5%) | 10                 | (38.5%) |
| Male                                           | 16                     | (38.1%) | 10                  | (62.5%) | 6                  | (37.5%) |
| Previous PCR test history n (%)                |                        |         |                     |         |                    |         |
| SARS-CoV-2 PCR positive                        | 8                      | (19.0%) | 1                   | (12.5%) | 7                  | (87.5%) |
| SARS-CoV-2 PCR negative                        | 18                     | (42.9%) | 6                   | (33.3%) | 12                 | (66.7%) |
| Not tested                                     | 16                     | (38.1%) | 9                   | (56.3%) | 7                  | (43.8%) |
| Symptoms, n (%)                                |                        |         |                     |         |                    |         |
| Sore throat                                    |                        |         |                     |         | 18                 | (69.2%) |
| Fatigue                                        |                        |         |                     |         | 13                 | (50%)   |
| Joint and muscle pain                          |                        |         |                     |         | 18                 | (69.2%) |
| Abdominal pain                                 |                        |         |                     |         | 1                  | (3.8%)  |
| Diarrhoea                                      |                        |         |                     |         | 6                  | (23.1%) |
| Cough                                          |                        |         |                     |         | 17                 | (65.4%) |
| Fever                                          |                        |         |                     |         | 10                 | (38.5%) |
| Loss of taste                                  |                        |         |                     |         | 6                  | (23.1%) |
| Loss of smell                                  |                        |         |                     |         | 4                  | (15.4%) |
| Shortness of breath or difficulty of breathing |                        |         |                     |         | 8                  | (30.8%) |
| Headache                                       |                        |         |                     |         | 16                 | (61.5%) |
